# Supplementary material
Source: Springer Nature journal article supplement (https://www.springermedizin.de/resource/supplementary/12875_2013_1013_MOESM3_ESM.pdf/9435934)
Supplement: MOESM3 [file 9435934]

**Table 3. Associations between patient factors and PHQ-9 screening outcome**

| Patient factor                                                | PHQ+ve, n(%) | PHQ-ve, n(%) | $\chi^2$ (df) | Multiple logistic regression ( <i>n</i> = 7675) <sup>a</sup> |                     |
|---------------------------------------------------------------|--------------|--------------|---------------|--------------------------------------------------------------|---------------------|
|                                                               |              |              |               | Wald $\chi^2$ (df) <sup>b</sup> / Adj. OR (95% CI)           |                     |
| <b>Gender</b>                                                 |              |              | 44.41 (1)**   | <i>11.24 (1)**</i>                                           | <i>4.55 (1)*</i>    |
| Male                                                          | 336 (32.4)   | 3721 (43.2)  |               | 1.00                                                         | 1.00                |
| Female                                                        | 702 (67.6)   | 4897 (56.8)  |               | 1.36 (1.14 - 1.62)                                           | 1.22 (1.02 - 1.46)  |
| <b>Age group</b>                                              |              |              | 17.11 (2)**   | <i>9.99 (2)**</i>                                            | <i>11.89 (2)**</i>  |
| 18-34 yrs                                                     | 316 (31.1)   | 2201 (26.0)  |               | 1.00                                                         | 1.00                |
| 35-54 yrs                                                     | 371 (36.5)   | 3045 (35.9)  |               | 0.95 (0.76 - 1.18)                                           | 0.87 (0.70 - 1.09)  |
| 55+ yrs                                                       | 329 (32.4)   | 3232 (38.1)  |               | 0.63 (0.46 - 0.87)                                           | 0.58 (0.42 - 0.80)  |
| <b>Education</b>                                              |              |              | 0.45 (1)      | <i>0.01 (1)</i>                                              | <i>0.09 (1)</i>     |
| Secondary or above                                            | 772 (75.0)   | 6514 (75.9)  |               | 1.00                                                         | 1.00                |
| Primary or no formal education                                | 258 (25.0)   | 2069 (24.1)  |               | 0.99 (0.78 - 1.25)                                           | 1.04 (0.82 - 1.32)  |
| <b>Marital status</b>                                         |              |              | 71.62 (1)**   | <i>28.18 (1)**</i>                                           | <i>24.14 (1)**</i>  |
| Married                                                       | 508 (49.3)   | 5394 (62.9)  |               | 1.00                                                         | 1.00                |
| Single/Separated/Divorced/Widowed                             | 523 (50.7)   | 3188 (37.1)  |               | 1.62 (1.35 - 1.93)                                           | 1.57 (1.31 - 1.88)  |
| <b>Working Status</b>                                         |              |              | 83.98 (4)**   | <i>32.09 (4)**</i>                                           | <i>22.70 (4)**</i>  |
| Employed                                                      | 582 (57.6)   | 5395 (63.5)  |               | 1.00                                                         | 1.00                |
| Unemployed                                                    | 48 (4.7)     | 116 (1.4)    |               | 2.74 (1.79 - 4.18)                                           | 2.31 (1.48 - 3.60)  |
| Retired                                                       | 201 (19.8)   | 1833 (21.6)  |               | 0.97 (0.72 - 1.31)                                           | 0.95 (0.70 - 1.29)  |
| House-maker                                                   | 129 (12.7)   | 899 (10.6)   |               | 1.33 (1.01 - 1.75)                                           | 1.30 (0.98 - 1.73)  |
| Student                                                       | 52 (5.1)     | 248 (2.9)    |               | 1.70 (1.17 - 2.47)                                           | 1.62 (1.11 - 2.37)  |
| <b>Household monthly income</b>                               |              |              | 75.00 (1)**   | <i>28.93 (1)**</i>                                           | <i>27.23 (1)**</i>  |
| More than HK\$30,000                                          | 220 (24.6)   | 2951 (39.4)  |               | 1.00                                                         | 1.00                |
| HK\$30,000 or below                                           | 676 (75.4)   | 4539 (60.6)  |               | 1.66 (1.38 - 2.00)                                           | 1.65 (1.37 - 2.00)  |
| <b>Ethnicity</b>                                              |              |              | 0.01 (1)      | <i>1.08 (1)</i>                                              | <i>0.16 (1)</i>     |
| Chinese                                                       | 1039 (96.3)  | 8471 (96.3)  |               | 1.00                                                         | 1.00                |
| Non-Chinese                                                   | 40 (3.7)     | 321 (3.7)    |               | 1.27 (0.81 - 1.98)                                           | 1.10 (0.69 - 1.74)  |
| <b>Smoking habit</b>                                          |              |              | 19.24 (1)**   | <i>10.09 (1)**</i>                                           | <i>8.90 (1)**</i>   |
| Non- or ex-smoker                                             | 847 (82.6)   | 7511 (87.4)  |               | 1.00                                                         | 1.00                |
| Current smoker                                                | 179 (17.4)   | 1079 (12.6)  |               | 1.44 (1.15 - 1.81)                                           | 1.42 (1.13 - 1.79)  |
| <b>Alcohol use</b>                                            |              |              | 0.18 (1)      | <i>0.40 (1)</i>                                              | <i>0.26 (1)</i>     |
| Less than once a week or never                                | 904 (87.9)   | 7510 (87.4)  |               | 1.00                                                         | 1.00                |
| More than once a week                                         | 125 (12.1)   | 1084 (12.6)  |               | 1.08 (0.85 - 1.39)                                           | 1.07 (0.83 - 1.38)  |
| <b>Regular exercise pattern</b>                               |              |              | 57.12 (1)**   | <i>29.46 (1)**</i>                                           | <i>28.34 (1)**</i>  |
| Yes                                                           | 647 (63.2)   | 6361 (74.3)  |               | 1.00                                                         | 1.00                |
| No exercise at all                                            | 377 (36.8)   | 2204 (25.7)  |               | 1.58 (1.34 - 1.86)                                           | 1.58 (1.33 - 1.86)  |
| <b>Seen a doctor in past 4 weeks</b>                          |              |              | 94.67 (1)**   | <i>41.12 (1)**</i>                                           | <i>30.88 (1)**</i>  |
| No                                                            | 356 (33.0)   | 4276 (48.7)  |               | 1.00                                                         | 1.00                |
| More than once                                                | 723 (67.0)   | 4512 (51.3)  |               | 1.70 (1.45 - 2.00)                                           | 1.60 (1.36 - 1.89)  |
| <b>Seen a TCM practitioner in past 4 weeks</b>                |              |              | 87.93 (1)**   | <i>32.20 (1)**</i>                                           | <i>31.28 (1)**</i>  |
| No                                                            | 751 (69.6)   | 7176 (81.6)  |               | 1.00                                                         | 1.00                |
| More than once                                                | 328 (30.4)   | 1615 (18.4)  |               | 1.70 (1.41 - 2.03)                                           | 1.70 (1.41 - 2.05)  |
| <b>Disease co-morbidity</b>                                   |              |              | 71.11 (2)**   | <i>63.57 (2)**</i>                                           | <i>48.96 (2)**</i>  |
| None                                                          | 437 (42.3)   | 4319 (50.2)  |               | 1.00                                                         | 1.00                |
| One                                                           | 223 (21.6)   | 2207 (25.7)  |               | 1.25 (1.01 - 1.55)                                           | 1.19 (0.96 - 1.48)  |
| Two or more                                                   | 374 (36.2)   | 2071 (24.1)  |               | 2.45 (1.95 - 3.08)                                           | 2.22 (1.76 - 2.80)  |
| <b>Family history mental illness</b>                          |              |              | 37.88 (1)**   | <i>31.05 (1)**</i>                                           | <i>16.62 (1)**</i>  |
| No                                                            | 869 (85.8)   | 7716 (91.6)  |               | 1.00                                                         | 1.00                |
| Yes                                                           | 144 (14.2)   | 704 (8.4)    |               | 1.89 (1.51 - 2.36)                                           | 1.62 (1.28 - 2.04)  |
| <b>Service sector</b>                                         |              |              | 8.37 (1)**    | <i>2.49 (1)</i>                                              | <i>2.29 (1)</i>     |
| Public                                                        | 318 (29.5)   | 2232 (25.4)  |               | 1.00                                                         | 1.00                |
| Private                                                       | 761 (70.5)   | 6560 (74.6)  |               | 0.85 (0.70 - 1.04)                                           | 0.85 (0.70 - 1.05)  |
| <b>Self-reported depression history<sup>c</sup></b>           |              |              | 420.70 (1)**  |                                                              | <i>125.97 (1)**</i> |
| No                                                            | 795 (78.0)   | 8104 (95.1)  |               |                                                              | 1.00                |
| Yes                                                           | 224 (22.0)   | 420 (4.9)    |               |                                                              | 4.10 (3.20 - 5.24)  |
| <b>Self-reported other mental illness history<sup>c</sup></b> |              |              | 110.70 (1)**  |                                                              | <i>4.82 (1)*</i>    |
| No                                                            | 888 (91.1)   | 8195 (97.4)  |               |                                                              | 1.00                |
| Yes                                                           | 87 (8.9)     | 219 (2.6)    |               |                                                              | 1.51 (1.05 - 2.17)  |

\* *p* < .05; \*\* *p* < .01

<sup>a</sup> Model Chi-square = 546.73, df = 22, *p* < .001; Nagelkerke R-square = 0.143; Hosmer & Lemeshow Test, Chi-square = 14.42, df = 8, *p* = 0.072

<sup>b</sup> Wald test statistics are shown in italic.

<sup>c</sup> Factors entered in second block of the regression model; Block Chi-square = 141.46, df = 2, *p* < .001.
